# Supplementary material for: Enhancing Prediction of Individualized Antipsychotic Outcome with fMRI-EEG Feature Integration in First-Episode Schizophrenia: A Real-World Study
Source: Research Square preprint supplement (doi:10.21203/rs.3.rs-6047108/v1), 2025-05-13
Supplement: Supplementary file 1 [file 426d2ece53e203654d3595cd.docx]

**Supplementary Materials**

**Title:**

**Enhancing Prediction of Individualized Antipsychotic Outcome with fMRI-EEG Feature Integration in First-Episode Schizophrenia: A Real-World Study**

The file includes:

Table S1 and Figure S1

**Participants and clinical**

Participants with excessive head motion (translational or rotational displacement > 3.0 mm or 3.0°, or mean frame-wise displacement > 0.3 mm) were excluded from further analysis. Twelve participants were excluded, leaving 78 for the final feature extraction and prediction. The demographic and clinical characteristics of the remaining participants are provided in Supplementary Table S1.

**Table S1.** Sample Characteristics and Treatment Outcomes(Mean ± SD).

| Variable | Baseline (n=78) | 8 weeks follow up  (n=78) | *P*-value |
| --- | --- | --- | --- |
| Age (years) | 26.27±9.34 |  |  |
| Education (years) | 11.24±3.54 |  |  |
| Gender (male/female) | 33/45 |  |  |
| Age of onset (years) | 23.93±9.432 |  |  |
| Duration(years) | 2.32±1.92 |  |  |
| PANSS-T | 125.20±20.34 | 59.45±23.76 | *P*<0.0001 |
| PANSS-P | 25.74±7.64 | 12.08±5.28 | *P*<0.0001 |
| PANSS-N | 34.42±6.47 | 17.56±7.96 | *P*<0.0001 |
| PANSS-G | 64.99±11.18 | 29.81±12.31 | *P*<0.0001 |

Note: SD, standard deviation; PANSS, Positive and Negative Syndrome Scale; PANSS-T, PANSS total scores; PANSS-P, PANSS positive symptom scores; PANSS-N, PANSS negative symptom scores; PANSS-G, PANSS general psychopathological symptom scores; Group comparisons were performed using the Wilcoxon signed-rank test.

**Impact of Outlier Removal on Individualized Prediction**

After removing the outlier data points, we performed individualized predictions again, and the results are shown in Figure S1. The predictions remained significant after the outliers were removed, demonstrating the stability and predictive power of the model even after excluding anomalous values.


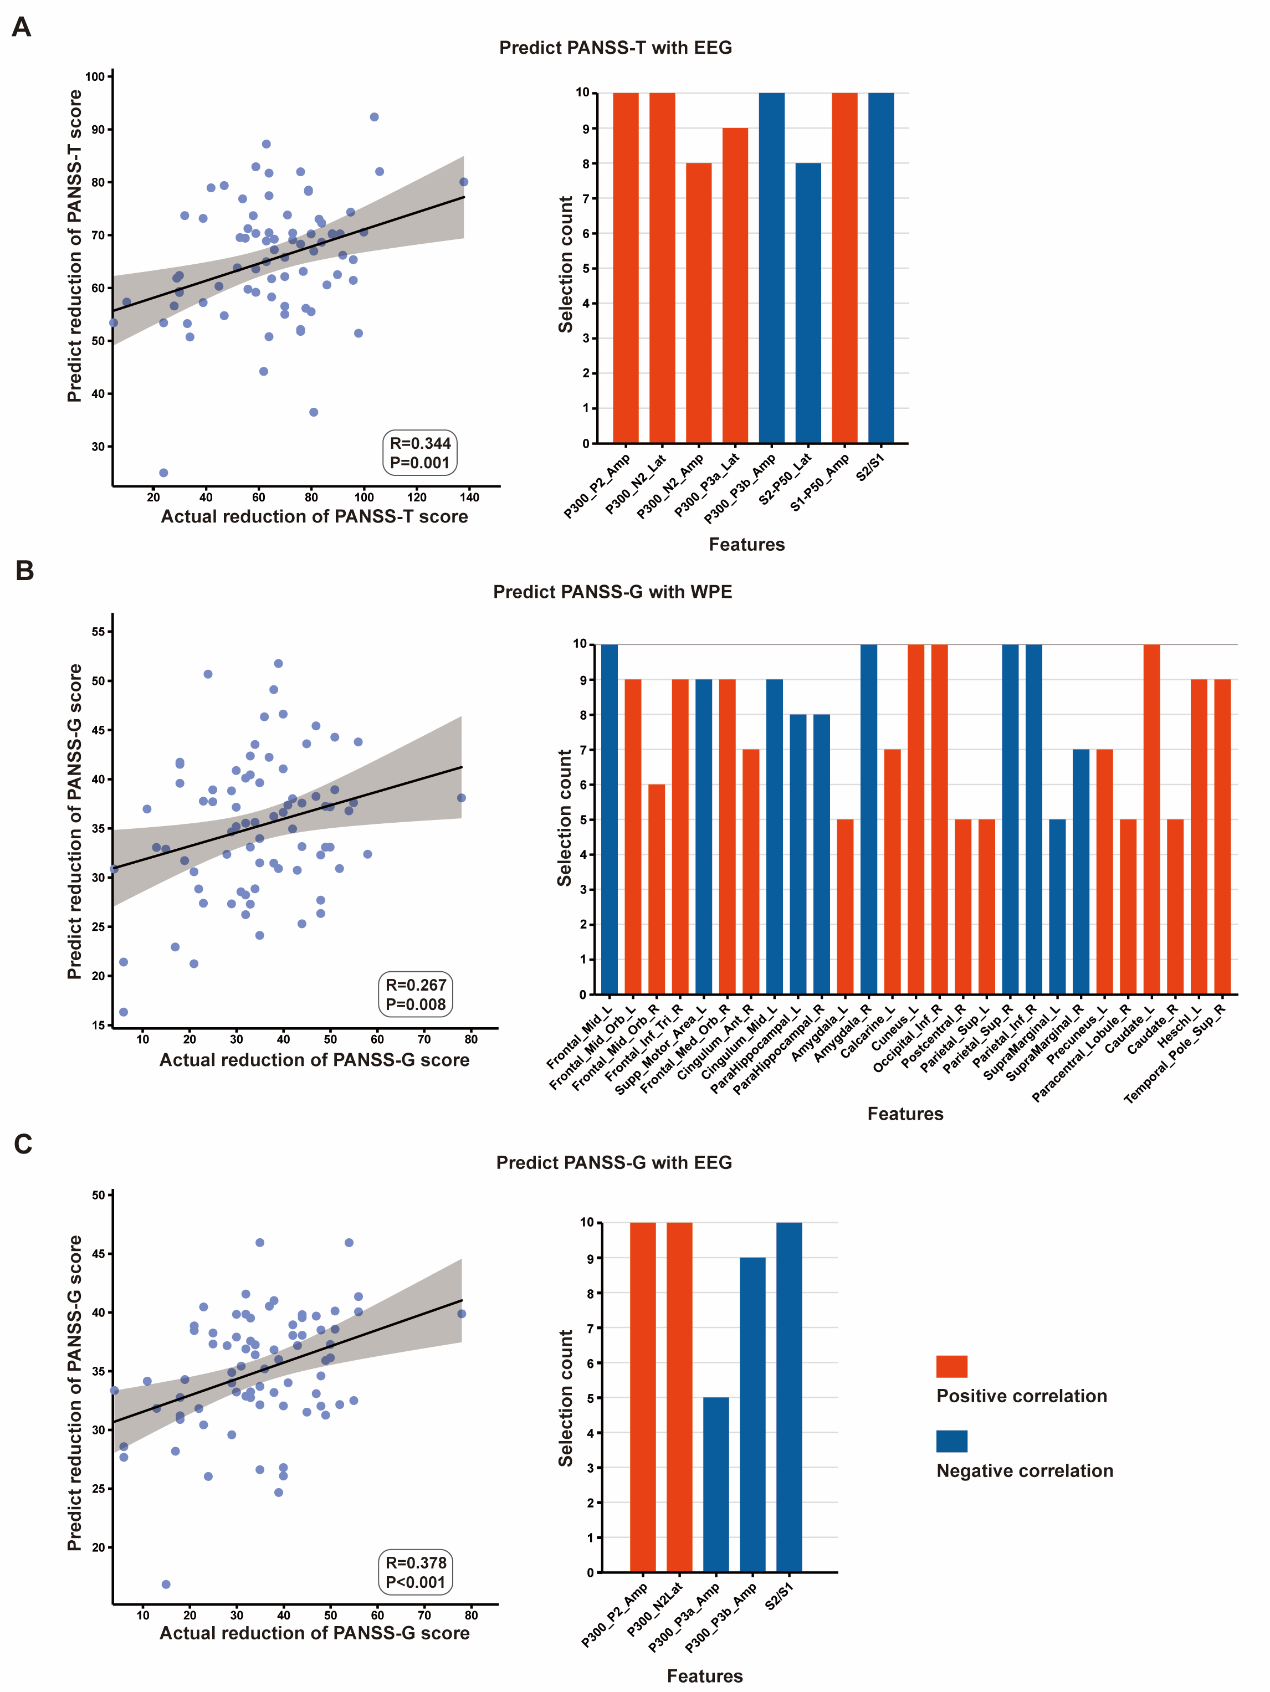


**Figure S1.** Prediction results after removing outliers. The left side of each panel presents the correlations between the predicted and observed reduction of symptom across individuals, and the right side of each panel shows the features selected at least five times from the 10 CV iterations in prediction of symptom changes.  A. Prediction of core PANSS-T score with EEG features as predictors. B. Prediction of core PANSS-G score with WPE features as predictors. C. Prediction of core PANSS-G score with EEG features as predictors. Features in orange were positively correlated with reduction of symptom, while features in blue were negatively correlated with reduction of symptom.
